# Supplementary material for: Copper thiocyanate (CuSCN): an efficient solution-processable hole transporting layer in organic solar cells
Source: Royal Society of Chemistry journal article supplement (doi:10.1039/c5tc03124a), 2015-01-01
Supplement: c5tc03124a1.pdf [file c5tc03124a1.pdf]

## Supporting information

### **Copper thiocyanate (CuSCN): an efficiency solution-processable hole transporting layer in organic solar cells**

*Neeraj Chaudhary,<sup>†,‡</sup> Rajiv Chaudhary,<sup>‡</sup> J. P. Kesari,<sup>‡</sup> Asit Patra,<sup>\*,†</sup> Suresh Chand<sup>†</sup>*

<sup>†</sup>CSIR-Network of Institutes for Solar Energy, Organic & Hybrid Solar Cells Group, Physics of Energy Harvesting Division, CSIR-National Physical Laboratory, Dr. K. S. Krishnan Marg, New Delhi-110012. Email: [apatra@nplindia.org](mailto:apatra@nplindia.org)

<sup>‡</sup>Department of Mechanical Engineering, Delhi Technological University, Delhi-110042.

### **Experimental**

All chemicals and materials were purchased from sigma-aldrich and Alfa Aesar and used without further purification unless otherwise stated. P3HT ( $M_n \sim 54,000$  and  $PDI < 2.5$ ) and were purchased from sigma-aldrich. PCDTBT, PTB7, PC<sub>61</sub>BM and PC<sub>71</sub>BM were purchased from 1-material, Canada.

#### **Preparation of CuSCN Hole Transport Layer (HTL)**

10 mg of copper(I) thiocyanate (CuSCN) was dissolved in 1 mL of diisopropyl sulfide and the resulting suspension mixture was sonicated for 4 hrs at room temperature. After sonicated the mixture was kept for 1 hr at room temperature and the insoluble portion was settle down. The clear solution was used for solution-processable HTL in organic solar cells.

#### **Preparation of MoO<sub>3</sub> Hole Transport Layer (HTL)**

10 nm Thickness HTL of MoO<sub>3</sub> was deposited by thermal evaporation at a pressure of  $5 \times 10^{-6}$  mbar

### Preparation of Active Materials

**P3HT:PC<sub>61</sub>BM:** P3HT and PC<sub>61</sub>BM were dissolved in chlorobenzene in the weight ratios from 1:0.8 and the concentration of the solution mixture of P3HT and PC<sub>61</sub>BM was 30 mg/mL in total.

**PCDTBT:PC<sub>71</sub>BM:** The composition ratio of PCDTBT:PC<sub>71</sub>BM is 1:4 that dissolved in a mixture of chlorobenzene and dichlorobenzene (1:3 ratio) in a concentration of 35 mg/mL.

**PTB7:PC<sub>71</sub>BM:** The compositions ratio of PTB7:PC<sub>71</sub>BM is 1:1.5 that dissolved in a mixture of chlorobenzene and 1,8-diiodooctane (97:3 vol%) in a concentration of 25 mg/mL.

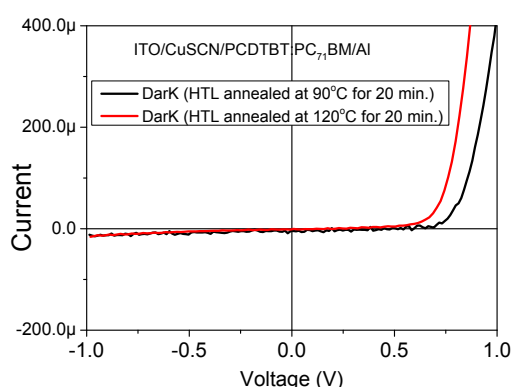

Figure S1. Dark curves for OPV devices for ITO/CuSCN/PCDTBT:PC<sub>71</sub>BM/Al geometry.

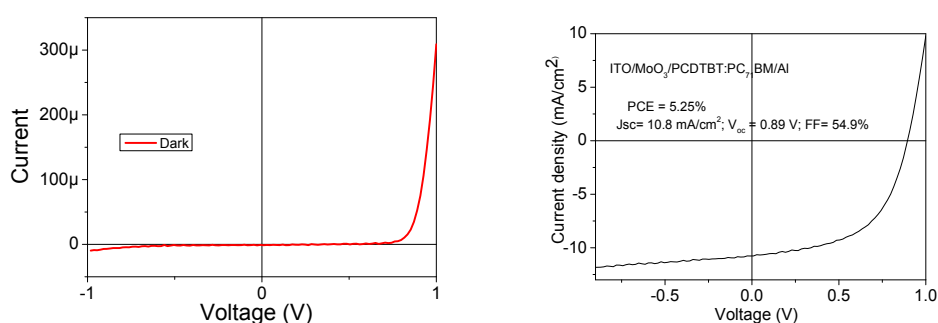

Figure S2. J-V curves for OPV device performance for ITO/MoO<sub>3</sub>/PCDTBT:PC<sub>71</sub>BM/Al geometry.

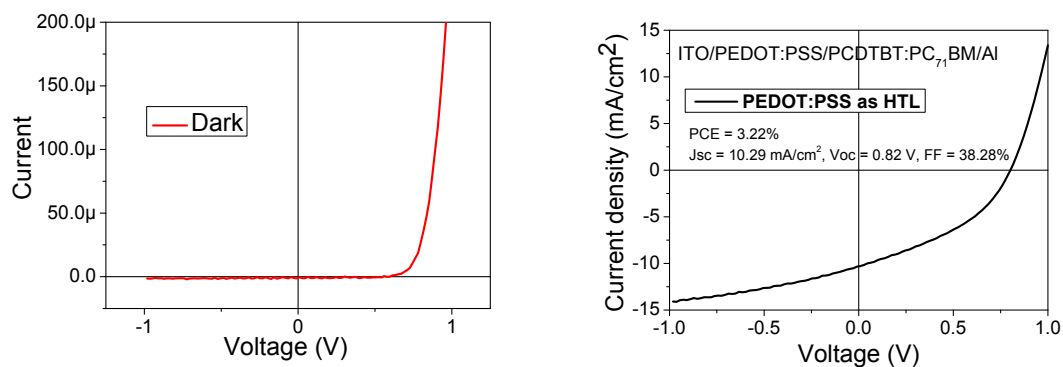

Figure S3. Dark and light J-V curves for OPV device for ITO/PEDOT:PSS/PCDTBT:PC<sub>71</sub>BM/Al geometry.

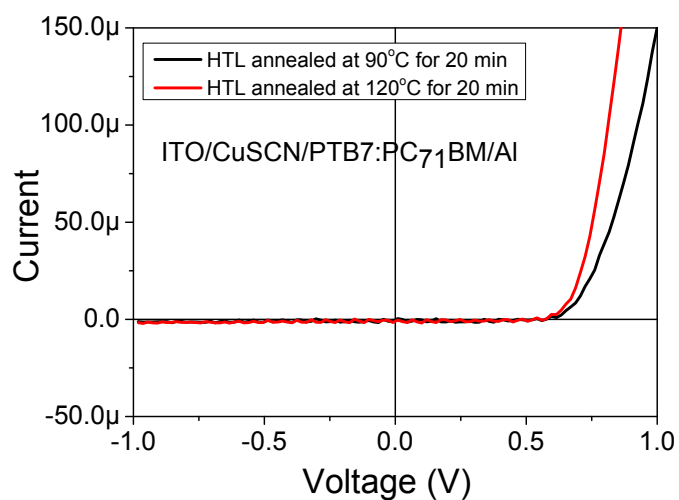

Figure S4. Dark curves for OPV devices for ITO/CuSCN/PTB7:PC<sub>71</sub>BM/Al geometry.

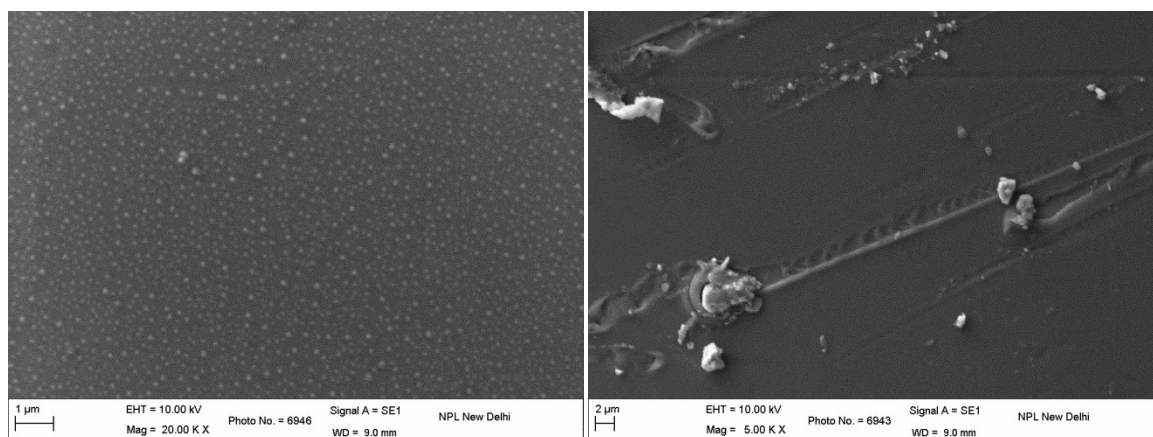

Figure S5. SEM images of (left)  $\text{MoO}_3$  film and (right) PEDOT:PSS film on ITO.
